# Supplementary material
Source: HighWire-hosted journal article supplement (http://cmajopen.ca/highwire/filestream/90154/field_highwire_adjunct_files/2/open-2022-0194-original-submission.pdf)
Supplement: open-2022-0194-original-submission.pdf [file open-2022-0194-original-submission.pdf]

1  
2  
3 **Association between physician continuity of care and patient outcomes in clinical**  
4 **teaching units: a cohort analysis**  
5

6  
7 **Authors:** Anshula Ambasta<sup>1, 2</sup> MD MPH, Irene W.Y. Ma<sup>1, 2</sup> MD, PhD; and Tyler Williamson<sup>1,</sup>  
8 <sup>3</sup> PhD  
9

10  
11 **Institutional affiliations:**  
12

- 13  
14 1) Cumming School of Medicine University of Calgary, Calgary, Alberta, Canada  
15 2) Ward of the 21<sup>st</sup> century, University of Calgary, Alberta, Canada  
16  
17 3) Department of Community Health Sciences, Centre for Health Informatics, University  
18 of Calgary, Calgary, Alberta, Canada  
19  
20  
21  
22

23 **Corresponding Author:** Dr. Anshula Ambasta MD MPH FRCPC; Address 1432 Health  
24 Sciences Center, 3330 Hospital Drive NW Calgary, AB T2N4N1; Phone number: 403-618-4586;  
25  
26 e-mail: [aambasta@ucalgary.ca](mailto:aambasta@ucalgary.ca)  
27  
28  
29

30 **Running Title:** Physician continuity of care and patient outcomes  
31

32 **Abstract Word Count:** 242  
33

34 **Manuscript Word Count:** 2183  
35

36 **Tables/Figures:** 2  
37

38 **Number of References:** 32  
39

40  
41 **Key Words for Indexing:** continuity of care, patient outcomes, length of stay, clinical teaching  
42 unit  
43  
44

45  
46 **Funding:** Department of Medicine at the University of Calgary and Alberta Health Services. The  
47 funding bodies played no role in the design of the study, collection, analysis, and interpretation of  
48 the data, and the decision to approve publication of the finished manuscript.  
49  
50

51 **Conflict of interest summary:** The authors have no relevant conflicts of interest to disclose  
52  
53  
54  
55  
56  
57

**ABSTRACT****Background:**

Clinical teaching units (CTUs) provide care to patients in scheduled time-blocks with regular handoffs. The objective of this study was to determine the association between attending physician handoffs on CTUs and patient outcomes.

**Methods:**

We conducted a retrospective multicenter cohort study using data from three tertiary care hospitals in Calgary, Alberta between January 1, 2015 to December 31, 2017. Hospitalizations in the top ten case-mix groups were included. We have previously used this cohort to describe the association between continuity of care and utilization of routine laboratory tests. Exposure variable was the number of attending physicians seen by a patient. Outcome measures were: admission to intensive care unit (ICU); in-patient, 7- and 30-day mortality, and 7- and 30-day readmission rate. Multivariable regression statistical models adjusted for age, sex, length of stay, Charlson comorbidity index, utilization of routine laboratory tests, case-mix group, and day of week of admission were used.

**Results:**

Our cohort included 4324 unique patients. There were no significant differences in the incidence rate ratios (IRR) of admission to ICU, in-patient mortality, and 7- day readmission and mortality between hospitalizations with one, two, or three or more attending physicians. However, both 30-day readmission (IRR 1.33, 95% CI: 1.04 to 1.71) and mortality rates (IRR 1.53, 95% CI 1.02 to 2.30) were higher with three or more attending physicians compared to one attending physician.

**Interpretation:**

Increased handoffs between attending physicians on CTUs is associated with increased 30-day

1  
2  
3 readmission and mortality rates.  
4  
5  
6  
7  
8  
9  
10  
11  
12  
13  
14  
15  
16  
17  
18  
19  
20  
21  
22  
23  
24  
25  
26  
27  
28  
29  
30  
31  
32  
33  
34  
35  
36  
37  
38  
39  
40  
41  
42  
43  
44  
45  
46  
47  
48  
49  
50  
51  
52  
53  
54  
55  
56  
57  
58  
59  
60

Confidential

## INTRODUCTION

Transitions of patient care through handoffs between healthcare teams are ubiquitous. In the primary care setting, outpatient physician continuity is associated with greater patient satisfaction<sup>1</sup>, improved health promotion<sup>2</sup>, increased adherence to medication<sup>3</sup>, reduced emergency department<sup>4</sup> and hospital use<sup>5</sup>, and lower costs<sup>4</sup>. Declines in continuity in the transition between community and hospital settings is associated with higher post-discharge costs and readmission rates. <sup>6</sup>In the setting of medical trainees<sup>7</sup> and nursing<sup>8,9</sup>, breaks in continuity of care have been associated with adverse events and errors<sup>10</sup>.

In the inpatient setting, hospitalists, usually general internists provide most general medical care in the United States. They typically work contiguous days, handing off patients at the end of their block, such that patients are likely to see more than one internist during their hospitalization<sup>11,12</sup>. Data on the association between these breaks in continuity of care in hospitals and patient outcomes is limited<sup>13,14</sup>. A recent study by Farid et al that assessed care handoffs among hospitalist physicians found no difference in mortality in the 30 days after discharge<sup>15</sup>. In an exploratory analysis however, patients with higher illness severity were noted to have a higher 30-day mortality with increased physician handoffs. In another study by Goodwin et al., patients cared for by hospitalists in the top quartile of continuous schedules had significantly lower post-discharge mortality, readmission rates, costs, and higher rates of discharge home, compared with patients cared for by hospitalists with discontinuous schedules<sup>11</sup>.

In Canada, the clinical teaching unit (CTU) is a team-based structure used to deliver care to general medical patients in academic hospitals<sup>16</sup>. The attending physician, a general internist, serves as the most responsible physician for patient care, while simultaneously teaching learners of various skill levels, and leading multidisciplinary teams of healthcare providers<sup>17</sup>. The attending physicians instruct and act as role models for the future physician workforce<sup>18</sup>. This role requires

1  
2  
3 the execution of professional competence and is vulnerable to several unpredictable contextual  
4 factors<sup>19</sup>. Given the complexity of this role, similar to the American setting<sup>12</sup>, an individual  
5 physician works a set number of contiguous days on the CTU to prevent burnout<sup>14</sup>. The prevalence  
6 of discontinuity of care by attending physicians on CTUs makes it important to understand its  
7 impact on patient outcomes. The objective of this retrospective cohort study was to examine the  
8 association between the number of attending physicians involved in a patient's care on the CTU,  
9 and patient outcomes in the form of admission to intensive care unit (ICU), re-admissions, and  
10 mortality.  
11  
12  
13  
14  
15  
16  
17  
18  
19  
20

## 21 **METHODS**

### 22 **Setting**

23  
24  
25 Our study examined data from three academic teaching hospitals in Calgary, Alberta  
26 representing six CTU teams. Attending physician handoff occurred on a fixed day of the week,  
27 usually every 7-14 days. The number of attending physicians seen by patients with the same length  
28 of stay could vary depending on the day of admission relative to the day of physician handoff, and  
29 number of contiguous days worked by their physician. CTU learner teams consisting of medical  
30 students and resident physicians changed every 28-days, with changeover days between attending  
31 physicians and learners typically being staggered to provide some continuity of care.  
32  
33  
34  
35  
36  
37  
38  
39  
40  
41

### 42 **Study design and participants/cohort creation**

43  
44 We report this study in accordance with the Strengthening the Reporting of Observational  
45 Studies in Epidemiology (STROBE) guidelines for observational research<sup>20</sup>. In this retrospective  
46 cohort study, we used the same cohort that we had previously used to describe the association  
47 between health system factors and utilization of routine laboratory tests on clinical teaching units<sup>21</sup>.  
48 All adult (age  $\geq 18$  year) hospitalizations at the three hospitals between January 2015 to December  
49 2017 were identified. Each hospitalization was then classified using the Case Mix group (CMG+)  
50  
51  
52  
53  
54  
55  
56  
57  
58  
59  
60

1  
2  
3 classification developed by the Canadian Institute of Health Information (CIHI)<sup>22</sup>. The final cohort  
4  
5 consisted of patients that represented the ten most common CMG+ groups, to facilitate  
6  
7 comparisons within similar groups of patients based on their clinical and resource utilization  
8  
9 characteristics.  
10

### 11 **Exposures/Variables**

12  
13  
14 The exposure of interest was the number of successive primary attending physicians seen by  
15  
16 a patient throughout their CTU admission.  
17  
18

### 19 **Outcomes**

20  
21 The patient outcomes we examined were 1) need for admission to ICU, 2) re-admissions at  
22  
23 7- and 30-days after discharge, and 3) in-patient and mortality at 7- and 30-days after discharge.  
24  
25

### 26 **Covariates/Controlled variables**

27  
28 A simple comparison of mortality rates between patients with one or more attending  
29  
30 physicians is confounded by the fact that patients that have more severe disease are more likely to  
31  
32 be admitted for longer, and have multiple attending physicians. We addressed this issue by  
33  
34 adjusting for patient length of stay. In addition, to allow for comparisons between similar groups  
35  
36 of patients, we adjusted for patient age, sex, utilization of routine laboratory tests, Charlson  
37  
38 comorbidity index<sup>23</sup>, and CMG+ group in all of our models. The panel of ‘routine’ laboratory tests  
39  
40 included complete blood count, electrolytes, creatinine, urea, international normalized ratio, partial  
41  
42 thromboplastin time, calcium, magnesium, phosphate, and creatine kinase.<sup>21,24</sup> Finally, we also  
43  
44 adjusted for day of week of admission given its association with patient mortality<sup>25</sup> in prior  
45  
46 literature.  
47  
48  
49  
50

### 51 **Data sources/Measurement**

52  
53  
54 We obtained data on the number of physicians involved in the care of each patient, day of the  
55  
56 week of admission, and utilization of routine laboratory tests from our hospital electronic medical  
57  
58

1  
2  
3 record system (Sunrise Clinical Manager, Allscripts, Chicago, IL.). We obtained patient variables  
4 including age, sex, Charlson comorbidity index, CMG+, length of stay, admission to ICU, re-  
5 admission, and mortality rates from the discharge abstract database.  
6  
7  
8

## 9 10 **Statistical Methods**

11  
12 We used mixed-effects logistic regression to model the outcomes of admission to the ICU,  
13 readmission (at 7 and 30-days) and mortality (inpatient, and at 7 and 30 days), adjusting for patient  
14 age, sex, Charlson comorbidity index, length of stay on the CTU, CMG+ category, day of week of  
15 admission, and utilization of routine laboratory tests. The number of attending physicians (one,  
16 two, three or more) was classified as a categorical variable. Consistent with our earlier work<sup>21</sup>, we  
17 examined whether the relationship between the number of attending physicians and each of the  
18 outcomes is modified by the number of tests ordered. Regression analyses were conducted at the  
19 patient level, recognizing that some patients had more than one hospitalization. P-values less than  
20 0.05 were regarded as statistically significant and the reported 95% confidence interval estimates  
21 are two-sided. All statistical analyses were performed using Stata SE V.15.2 (Stata Corp, College  
22 Station, TX, USA).  
23  
24  
25  
26  
27  
28  
29  
30  
31  
32  
33  
34  
35  
36

## 37 **Ethics approval**

38  
39  
40 The study was approved by the institutional review board Conjoint Health Research Ethics  
41 Board of the University of Calgary with a waiver of informed consent (CHREB 19-0549).  
42  
43  
44  
45

## 46 **RESULTS**

### 47 **Cohort characteristics:**

48  
49  
50 There were 111,207 in-hospital patient days between January 2015 to December 2017 across  
51 CTUS in the three hospitals. 74,540 in-hospital patient-days that did not belong in the top ten  
52 CMG+ categories were excluded. Our final cohort included 36,667 hospital patient-days with 4324  
53  
54  
55  
56  
57

1  
2  
3 unique patients over 5071 hospitalizations<sup>21</sup>. The top ten CMG+ groups were as follows: i) heart  
4 failure without coronary angiogram, ii) other/unspecified sepsis or shock, iii) chronic obstructive  
5 pulmonary disease, iv) cirrhosis/alcoholic hepatitis, v) viral/unspecified pneumonia, vi) diabetes,  
6  
7  
8  
9  
10 vii) renal failure, viii) gastrointestinal hemorrhage, ix) respiratory failure, and x) disorders of fluid  
11 or electrolyte imbalance. Cohort characteristics are described in **Table 1**. The mean [SD] age of  
12 the cohort was 63.4 [18.2] with 44.8% females. The median length of stay was 5 days. 37% of  
13 hospitalizations involved one attending physician, 41% included two, and approximately 22% of  
14 hospitalizations involved three or more attending physicians.  
15  
16  
17  
18  
19  
20

### 21 **Outcomes:**

22  
23  
24 Associations between number of attending physicians and patient outcomes are listed in  
25  
26 **Table 2**. As compared to having one attending physician throughout a patient's hospitalization,  
27 there was no significant difference in the rates of admission to intensive care unit for patients with  
28 two, or three or more attending physicians. Similarly, with respect to inpatient mortality, and 7-  
29 day readmission and mortality rates, no significant differences were noted with two, or three or  
30 more physicians as compared to one attending physician. The post-discharge 30-day readmission  
31 and mortality rates, although not significantly different between one versus two attending  
32 physicians, were significantly increased when comparing one to three or more attending  
33 physicians, with the adjusted incidence rate ratio being 1.33 (95% CI 1.04 to 1.71) and 1.53 (95%  
34 CI 1.02 to 2.30) respectively.  
35  
36  
37  
38  
39  
40  
41  
42  
43  
44  
45

### 46 **INTERPRETATION**

47  
48  
49 In this retrospective cohort study, we found no significant associations between attending  
50 physician handoffs and patient outcomes in the form of ICU transfer, in-patient mortality and 7-  
51 day readmissions and mortality on clinical teaching units. However, we did find modest significant  
52 increases in both 30-day readmission and mortality rates with three or more attending physicians  
53  
54  
55  
56  
57



1  
2  
3 as compared to a single attending physician.  
4

5  
6 Research on the association between breaks in continuity of care and quality of care has been  
7 limited to specific diseases, single institutions, trainee-setting<sup>7</sup>, or specific outcomes such as length  
8 of stay as opposed to mortality<sup>26,27</sup>. A recent systematic review revealed that increased continuity  
9 of care by doctors, in any setting, is associated with lower mortality rate<sup>28</sup>. However, most studies  
10 examined continuity in the outpatient setting, or in the transition from inpatient to outpatient  
11 setting. Our findings are similar to other studies that have examined the impact of physician  
12 handoffs in the inpatient context. The study by Goodwin et al that examined hospitalist handoffs  
13 in the United States found that patients cared for by hospitalists in the highest quartile of scheduled  
14 continuity (i.e., a 7-day routine) had lower 30-day mortality, lower readmission rates, higher rates  
15 of discharge to home, and lower 30-day post-discharge costs<sup>11</sup>. Unlike our cohort where 7-day  
16 schedules were the norm, in this study 7-day routines were included in the highest quantile of  
17 continuity, with worse outcomes noted with more discontinuous schedules. More recently, Farid  
18 et al. examined the impact of physician handoff among hospitalized Medicare patients in the  
19 United States<sup>15</sup>. The authors restricted their analysis to hospitalists who worked at least seven  
20 consecutive days, and compared 30-day post-discharge mortality of patients with different  
21 probabilities of handoff based on date of patient admission relative to handover schedule. Even  
22 though they found no overall association between physician handoffs and 30-day mortality, an  
23 exploratory analysis suggested an increase in 30-day mortality for sicker patients.  
24  
25  
26  
27  
28  
29  
30  
31  
32  
33  
34  
35  
36  
37  
38  
39  
40  
41  
42  
43  
44  
45

46  
47 The results of our study, taken together with existing literature in the inpatient setting, suggest  
48 a relationship between attending physician handoff and 30-day readmission and mortality. Even  
49 though proximal patient outcomes like need for ICU, mortality in hospital, and 7-day readmission  
50 and mortality rates seem comparable, we hypothesize that some loss of data particularly with two  
51 or more handoffs contributes to the worse outcomes seen at 30-days. Work schedules for  
52  
53  
54  
55  
56  
57

1  
2  
3 hospitalist physicians in the US vary greatly <sup>12,14</sup> in an effort to balance physician wellbeing with  
4  
5 increasing continuity<sup>29</sup>. In Canada, there is no consensus on the optimum duration of service for  
6  
7 attending physicians on CTUs, with competing arguments related to impact of continuity of care,  
8  
9 adverse effects of physician fatigue, and perceived improvements in care because of second review  
10  
11 with handoff<sup>30</sup>. Related research has shown other impacts of breaks in physician continuity such  
12  
13 as increase in redundant use of diagnostic testing<sup>21,31,32</sup>. More research is needed to identify the  
14  
15 full spectrum of downstream outcomes of breaks in attending physician continuity of care on CTUs  
16  
17 at the patient, provider and health systems level.  
18  
19  
20

21  
22 There are several limitations of our study. First, it was observational, and although our  
23  
24 analyses adjusted for patient age, sex, length of stay, Charlson comorbidity index, CMG+  
25  
26 classification, day of week of admission and utilization of routine laboratory tests, our conclusions  
27  
28 are limited by the presence of potential unmeasured confounders. Second, our outcomes, although  
29  
30 broader than mortality alone, did not include metrics for medical errors, delays in care, resource  
31  
32 utilization, or patient satisfaction. Third, data on the quality of handoffs between physicians was  
33  
34 lacking, which would have been helpful in interpreting the results. Fourth, although three hospitals  
35  
36 were included in our analysis, our study was limited to a single-city, which operates using a similar  
37  
38 format for inpatient CTUs. While the CTU is a widely used structure for the care of medical  
39  
40 inpatients across Canada, differences between hospitals in Calgary and other cities (e.g. health  
41  
42 record systems, patient population) may affect the applicability of our findings to other centers.  
43  
44 Finally, patients outside of the 10 most common CMG+ categories were excluded from our final  
45  
46 cohort. While this enabled us to make comparisons within similar patient groups, it does limit the  
47  
48 generalizability of our findings.  
49  
50  
51  
52  
53

54  
55 In conclusion, in this retrospective cohort study conducted on inpatients CTUs at three  
56  
57 tertiary hospitals, having three or more attending physicians compared to one was associated with a  
58  
59  
60

1  
2  
3 significant modest increase in 30-day readmission and mortality. Further studies are needed to  
4  
5 validate this finding, and examine other pertinent outcomes impacted by breaks in continuity of  
6  
7 attending physician on CTUs.  
8  
9

## 10 11 12 **ACKNOWLEDGEMENT**

13  
14 We acknowledge the Department of Medicine at the University of Calgary and Alberta Health  
15  
16 Services for funding this project. The funding bodies played no role in the design of the study,  
17  
18 collection, analysis, and interpretation of the data, and the decision to approve publication of the  
19  
20 finished manuscript.  
21  
22

## 23 **CONFLICT OF INTEREST SUMMARY**

24  
25 The authors have no relevant conflicts of interest to disclose  
26  
27

## 28 **DATA AVAILABILITY STATEMENT**

29  
30 The dataset analyzed in this study is available from Alberta Health Services upon request in  
31  
32 accordance with institutional policies and procedures.  
33  
34  
35  
36  
37  
38  
39  
40  
41  
42  
43  
44  
45  
46  
47  
48  
49  
50  
51  
52  
53  
54  
55  
56  
57  
58  
59  
60

**Table 1: Patient and hospitalization characteristics of the cohort**

|                                                          | <b>Complete cohort</b>     | <b>Patients seen by one attending physician</b> | <b>Patients seen by two attending physicians</b> | <b>Patients seen by <math>\geq 3</math> attending physicians</b> |
|----------------------------------------------------------|----------------------------|-------------------------------------------------|--------------------------------------------------|------------------------------------------------------------------|
| Number (%)                                               | 5071 (100)                 | 1856 (36.6%)                                    | 2070 (40.8%)                                     | 1145 (22.6%)                                                     |
| Female, No. (%)                                          | 2270 (44.8%)               | 818 (44.1%)                                     | 941 (45.5%)                                      | 511 (44.6%)                                                      |
| Age, mean (SD), years                                    | 63.4 (18.2)                | 58.5 (19.5)                                     | 62.7 (17.9)                                      | 68.8 (15.6)                                                      |
| Median length of stay, (IQR)                             | 5.09 (2.81-9.95, IQR 7.14) | 2.91 (1.81-4.67, IQR 2.86)                      | 5.51 (3.30-8.12, IQR 4.82)                       | 15.66 (9.44-27.69, IQR 18.25)                                    |
| ICU admission, No. (%)                                   | 379 (7.5%)                 | 114 (6.1%)                                      | 141 (6.8%)                                       | 124 (10.8%)                                                      |
| Charlson comorbidity index, median (IQR)                 | 2 (2)                      | 1 (1-3, IQR 2)                                  | 2 (1-3, IQR 2)                                   | 2 (1-3, IQR 2)                                                   |
| Patients seen by teams without senior residents, No. (%) | 3474 (68.4%)               | 1360 (73.3%)                                    | 1406 (67.9%)                                     | 708 (61.8%)                                                      |

IQR: Interquartile range

**Table 2: Associations between attending physician continuity and patient outcomes adjusting for patient age, sex, Charlson comorbidity index, length of stay on the CTU, and CMG+ category**

| Patient outcomes                       | Adjusted incidence rate ratio [95% CI] with two attending physicians compared to one | P-value | Adjusted incidence rate ratio [95% CI] with $\geq 3$ attending physicians compared to one | P-value      |
|----------------------------------------|--------------------------------------------------------------------------------------|---------|-------------------------------------------------------------------------------------------|--------------|
| Admission to Intensive Care Unit       | 1.19 [95% CI 0.81 to 1.75]                                                           | 0.369   | 0.61 [95% CI 0.34 to 1.09]                                                                | 0.093        |
| In-patient mortality                   | 0.94 [95% CI 0.69 to 1.28]                                                           | 0.703   | 1.00 [95% CI 0.71 to 1.43]                                                                | 0.970        |
| Post-discharge 7-Day mortality rate    | 0.90 [0.67 to 1.22]                                                                  | 0.515   | 1.18 [95% CI 0.84 to 1.67]                                                                | 0.333        |
| Post-discharge 30-Day mortality rate   | 1.02 [0.72 to 1.44]                                                                  | 0.904   | <b>1.53 [95% CI 1.02 to 2.30]</b>                                                         | <b>0.040</b> |
| Post-discharge 7-Day readmission rate  | 1.07 [0.82 to 1.39]                                                                  | 0.616   | 1.17 [95% CI 0.85 to 1.62]                                                                | 0.329        |
| Post-discharge 30-Day readmission rate | 1.10 [0.90 to 1.34]                                                                  | 0.346   | <b>1.33 [1.04 to 1.71]</b>                                                                | <b>0.024</b> |

## REFERENCES:

1. Baker R, Streatfield J. What type of general practice do patients prefer? Exploration of practice characteristics influencing patient satisfaction. *The British journal of general practice : the journal of the Royal College of General Practitioners*. 1995;45(401):654-659.
2. Cabana MD, Jee SH. Does continuity of care improve patient outcomes? *The Journal of family practice*. 2004;53(12):974-980.
3. Chen CC, Tseng CH, Cheng SH. Continuity of care, medication adherence, and health care outcomes among patients with newly diagnosed type 2 diabetes: a longitudinal analysis. *Medical care*. 2013;51(3):231-237.
4. Willett LL, Landefeld CS. The Costs and Benefits of Hospital Care by Primary Physicians: Continuity Counts. *JAMA Intern Med*. 2017;177(12):1788-1789.
5. Barker I, Steventon A, Deeny SR. Association between continuity of care in general practice and hospital admissions for ambulatory care sensitive conditions: cross sectional study of routinely collected, person level data. *BMJ (Clinical research ed)*. 2017;356:j84.
6. Kuo YF, Goodwin JS. Association of hospitalist care with medical utilization after discharge: evidence of cost shift from a cohort study. *Annals of internal medicine*. 2011;155(3):152-159.
7. Landrigan CP, Rahman SA, Sullivan JP, et al. Effect on Patient Safety of a Resident Physician Schedule without 24-Hour Shifts. *The New England journal of medicine*. 2020;382(26):2514-2523.
8. Birmingham P, Buffum MD, Blegen MA, Lyndon A. Handoffs and Patient Safety: Grasping the Story and Painting a Full Picture. *Western journal of nursing research*. 2015;37(11):1458-1478.
9. Natafqi N, Zhu X, Baloh J, Vellinga K, Vaughn T, Ward MM. Critical Access Hospital Use of TeamSTEPPS to Implement Shift-Change Handoff Communication. *Journal of nursing care quality*. 2017;32(1):77-86.
10. Arora VM, Manjarrez E, Dressler DD, Basaviah P, Halasyamani L, Kripalani S. Hospitalist handoffs: a systematic review and task force recommendations. *J Hosp Med*. 2009;4(7):433-440.
11. Goodwin JS, Li S, Kuo YF. Association of the Work Schedules of Hospitalists With Patient Outcomes of Hospitalization. *JAMA Intern Med*. 2020;180(2):215-222.
12. Goodwin JS, Zhou J, Kuo YF, Nattinger AB. Work Schedules of Hospitalists and Continuity of Care During Hospital Stays of Texas Medicare Patients: an Observational Study. *Journal of general internal medicine*. 2019;34(4):489-491.
13. Fletcher KE, Sharma G, Zhang D, Kuo YF, Goodwin JS. Trends in inpatient continuity of care for a cohort of Medicare patients 1996-2006. *J Hosp Med*. 2011;6(8):438-444.
14. Wachter RM, Goldman L. Zero to 50,000 - The 20th Anniversary of the Hospitalist. *The New England journal of medicine*. 2016;375(11):1009-1011.
15. Farid M, Tsugawa Y, Jena AB. Assessment of Care Handoffs Among Hospitalist Physicians and 30-Day Mortality in Hospitalized Medicare Beneficiaries. *JAMA network open*. 2021;4(3):e213040.
16. Gupta S, Detsky AS. Prioritizing continuity in Canadian clinical teaching units. *CMAJ : Canadian Medical Association journal = journal de l'Association medicale canadienne*. 2014;186(10):800.
17. Tang B, Sandarage R, Dutkiewicz K, et al. Clinical teaching unit design: a realist systematic review protocol of evidence-based practices for clinical education and health service delivery. *BMJ open*. 2020;10(2):e034370.
18. Cruess SR, Cruess RL, Steinert Y. Role modelling--making the most of a powerful teaching strategy. *BMJ (Clinical research ed)*. 2008;336(7646):718-721.
19. Lemaire JB, Wallace JE, Sargious PM, et al. How Attending Physician Preceptors Negotiate Their Complex Work Environment: A Collective Ethnography. *Acad Med*. 2017;92(12):1765-1773.
20. von Elm E, Altman DG, Egger M, Pocock SJ, Gøtzsche PC, Vandenbroucke JP. The Strengthening the Reporting of Observational Studies in Epidemiology (STROBE) statement: guidelines for reporting observational studies. *Bulletin of the World Health Organization*. 2007;85(11):867-872.
21. Tam K, Williamson T, Ma IWY, Ambasta A. Association Between Health System Factors and

- Utilization of Routine Laboratory Tests in Clinical Teaching Units: a Cohort Analysis. *Journal of general internal medicine*. 2021.
22. CIHI. CMG+| CIHI. 2021; <https://www.cihi.ca/en/cmgs>. . Accessed August 2021, 2021.
23. Frenkel WJ, Jongerius EJ, Mandjes-van Uitert MJ, van Munster BC, de Rooij SE. Validation of the Charlson Comorbidity Index in acutely hospitalized elderly adults: a prospective cohort study. *Journal of the American Geriatrics Society*. 2014;62(2):342-346.
24. Ambasta A, Ma IWY, Woo S, Lonergan K, Mackay E, Williamson T. Impact of an education and multilevel social comparison-based intervention bundle on use of routine blood tests in hospitalised patients at an academic tertiary care hospital: a controlled pre-intervention post-intervention study. *BMJ quality & safety*. 2020.
25. Honeyford K, Cecil E, Lo M, Bottle A, Aylin P. The weekend effect: does hospital mortality differ by day of the week? A systematic review and meta-analysis. *BMC Health Serv Res*. 2018;18(1):870.
26. Smith JP, Mehta RH, Das SK, et al. Effects of end-of-month admission on length of stay and quality of care among inpatients with myocardial infarction. *Am J Med*. 2002;113(4):288-293.
27. Epstein K, Juarez E, Epstein A, Loya K, Singer A. The impact of fragmentation of hospitalist care on length of stay. *J Hosp Med*. 2010;5(6):335-338.
28. Pereira Gray DJ, Sidaway-Lee K, White E, Thorne A, Evans PH. Continuity of care with doctors-a matter of life and death? A systematic review of continuity of care and mortality. *BMJ open*. 2018;8(6):e021161.
29. Ali NA, Hammersley J, Hoffmann SP, et al. Continuity of care in intensive care units: a cluster-randomized trial of intensivist staffing. *American journal of respiratory and critical care medicine*. 2011;184(7):803-808.
30. Gates M, Wingert A, Featherstone R, Samuels C, Simon C, Dyson MP. Impact of fatigue and insufficient sleep on physician and patient outcomes: a systematic review. *BMJ open*. 2018;8(9):e021967.
31. Bertrand J, Fehlmann C, Groscurin O, Sarasin F, Kherad O. Inappropriateness of Repeated Laboratory and Radiological Tests for Transferred Emergency Department Patients. *Journal of clinical medicine*. 2019;8(9).
32. Rogg JG, Rubin JT, Hansen P, Liu SW. The frequency and cost of redundant laboratory testing for transferred ED patients. *The American journal of emergency medicine*. 2013;31(7):1121-1123.

STROBE Statement—Checklist of items that should be included in reports of *cohort studies*

|                              | Item No | Recommendation                                                                                                                                                                                                                                                                                                         | Page No |
|------------------------------|---------|------------------------------------------------------------------------------------------------------------------------------------------------------------------------------------------------------------------------------------------------------------------------------------------------------------------------|---------|
| <b>Title and abstract</b>    | 1       | (a) Indicate the study's design with a commonly used term in the title or the abstract<br>(b) Provide in the abstract an informative and balanced summary of what was done and what was found                                                                                                                          | 1/2/3   |
| <b>Introduction</b>          |         |                                                                                                                                                                                                                                                                                                                        |         |
| Background/rationale         | 2       | Explain the scientific background and rationale for the investigation being reported                                                                                                                                                                                                                                   | 4/5     |
| Objectives                   | 3       | State specific objectives, including any prespecified hypotheses                                                                                                                                                                                                                                                       | 4/5     |
| <b>Methods</b>               |         |                                                                                                                                                                                                                                                                                                                        |         |
| Study design                 | 4       | Present key elements of study design early in the paper                                                                                                                                                                                                                                                                | 5/6/7   |
| Setting                      | 5       | Describe the setting, locations, and relevant dates, including periods of recruitment, exposure, follow-up, and data collection                                                                                                                                                                                        | 5       |
| Participants                 | 6       | (a) Give the eligibility criteria, and the sources and methods of selection of participants. Describe methods of follow-up<br>(b) For matched studies, give matching criteria and number of exposed and unexposed                                                                                                      | 5       |
| Variables                    | 7       | Clearly define all outcomes, exposures, predictors, potential confounders, and effect modifiers. Give diagnostic criteria, if applicable                                                                                                                                                                               | 6       |
| Data sources/<br>measurement | 8*      | For each variable of interest, give sources of data and details of methods of assessment (measurement). Describe comparability of assessment methods if there is more than one group                                                                                                                                   | 6       |
| Bias                         | 9       | Describe any efforts to address potential sources of bias                                                                                                                                                                                                                                                              | 6       |
| Study size                   | 10      | Explain how the study size was arrived at                                                                                                                                                                                                                                                                              | 6       |
| Quantitative variables       | 11      | Explain how quantitative variables were handled in the analyses. If applicable, describe which groupings were chosen and why                                                                                                                                                                                           | 6       |
| Statistical methods          | 12      | (a) Describe all statistical methods, including those used to control for confounding<br>(b) Describe any methods used to examine subgroups and interactions<br>(c) Explain how missing data were addressed<br>(d) If applicable, explain how loss to follow-up was addressed<br>(e) Describe any sensitivity analyses | 7       |
| <b>Results</b>               |         |                                                                                                                                                                                                                                                                                                                        |         |
| Participants                 | 13*     | (a) Report numbers of individuals at each stage of study—eg numbers potentially eligible, examined for eligibility, confirmed eligible, included in the study, completing follow-up, and analysed<br>(b) Give reasons for non-participation at each stage<br>(c) Consider use of a flow diagram                        | 7/8     |
| Descriptive data             | 14*     | (a) Give characteristics of study participants (eg demographic, clinical, social) and information on exposures and potential confounders<br>(b) Indicate number of participants with missing data for each variable of interest<br>(c) Summarise follow-up time (eg, average and total amount)                         | 7/8     |
| Outcome data                 | 15*     | Report numbers of outcome events or summary measures over time                                                                                                                                                                                                                                                         | 7/8     |



|    |                          |    |                                                                                                                                                                                                              |     |
|----|--------------------------|----|--------------------------------------------------------------------------------------------------------------------------------------------------------------------------------------------------------------|-----|
| 1  | Main results             | 16 | (a) Give unadjusted estimates and, if applicable, confounder-adjusted estimates and their precision (eg, 95% confidence interval). Make clear which confounders were adjusted for and why they were included | 7/8 |
| 2  |                          |    | (b) Report category boundaries when continuous variables were categorized                                                                                                                                    |     |
| 3  |                          |    | (c) If relevant, consider translating estimates of relative risk into absolute risk for a meaningful time period                                                                                             |     |
| 4  |                          |    |                                                                                                                                                                                                              |     |
| 5  |                          |    |                                                                                                                                                                                                              |     |
| 6  |                          |    |                                                                                                                                                                                                              |     |
| 7  |                          |    |                                                                                                                                                                                                              |     |
| 8  |                          |    |                                                                                                                                                                                                              |     |
| 9  | Other analyses           | 17 | Report other analyses done—eg analyses of subgroups and interactions, and sensitivity analyses                                                                                                               | 7/8 |
| 10 |                          |    |                                                                                                                                                                                                              |     |
| 11 | <b>Discussion</b>        |    |                                                                                                                                                                                                              |     |
| 12 |                          |    |                                                                                                                                                                                                              |     |
| 13 | Key results              | 18 | Summarise key results with reference to study objectives                                                                                                                                                     | 8   |
| 14 | Limitations              | 19 | Discuss limitations of the study, taking into account sources of potential bias or imprecision. Discuss both direction and magnitude of any potential bias                                                   | 10  |
| 15 |                          |    |                                                                                                                                                                                                              |     |
| 16 | Interpretation           | 20 | Give a cautious overall interpretation of results considering objectives, limitations, multiplicity of analyses, results from similar studies, and other relevant evidence                                   | 10  |
| 17 |                          |    |                                                                                                                                                                                                              |     |
| 18 |                          |    |                                                                                                                                                                                                              |     |
| 19 | Generalisability         | 21 | Discuss the generalisability (external validity) of the study results                                                                                                                                        | 9   |
| 20 |                          |    |                                                                                                                                                                                                              |     |
| 21 | <b>Other information</b> |    |                                                                                                                                                                                                              |     |
| 22 | Funding                  | 22 | Give the source of funding and the role of the funders for the present study and, if applicable, for the original study on which the present article is based                                                | 11  |
| 23 |                          |    |                                                                                                                                                                                                              |     |
| 24 |                          |    |                                                                                                                                                                                                              |     |

\*Give information separately for exposed and unexposed groups.

**Note:** An Explanation and Elaboration article discusses each checklist item and gives methodological background and published examples of transparent reporting. The STROBE checklist is best used in conjunction with this article (freely available on the Web sites of PLoS Medicine at <http://www.plosmedicine.org/>, Annals of Internal Medicine at <http://www.annals.org/>, and Epidemiology at <http://www.epidem.com/>). Information on the STROBE Initiative is available at <http://www.strobe-statement.org>.
